# Supplementary material for: The Conservation and Study of Macromycetes in the Komarov Botanical Institute Basidiomycetes Culture Collection—Their Taxonomical Diversity and Biotechnological Prospects
Source: MDPI journal article supplement (doi:10.3390/jof9121196), 2023-12-14
Supplement: s1 [file s1]

Table S1

### Results of the express assays of oxidative and cellulolytic enzymes in the studied pure cultures

| Strains / Species                             | GenBank accession number | Rot type        | LGR <sup>1</sup> | Enzymatic activity, d (mm) |                  | Origin of strains    |                             | References |
|-----------------------------------------------|--------------------------|-----------------|------------------|----------------------------|------------------|----------------------|-----------------------------|------------|
|                                               |                          |                 |                  | ABTS <sup>2</sup>          | CMC <sup>3</sup> | Region               | Host tree                   |            |
| AGARICALES                                    |                          |                 |                  |                            |                  |                      |                             |            |
| Pleurotaceae                                  |                          |                 |                  |                            |                  |                      |                             |            |
| LE-BIN 4126 <i>Pleurotus ostreatus</i>        | —                        | WR <sup>4</sup> | M                | 17.9±1.0                   | 21.2±1.0         | Bryansk Oblast       | <i>Acer platanoides</i>     | 1          |
| LE-BIN 4132 <i>P. ostreatus</i>               | —                        | WR              | M                | 15.7±0.7                   | 21.4±0.9         | Bryansk Oblast       | <i>Acer platanoides</i>     | 1          |
| LE-BIN 4111 <i>Pleurotus pulmonarius</i>      | —                        | WR              | M                | 18.6±1.2                   | 28.8±1.1         | Bryansk Oblast       | <i>Populus tremula</i>      |            |
| Pterulaceae                                   |                          |                 |                  |                            |                  |                      |                             |            |
| LE-BIN 3587 <i>Radulomyces confluens</i>      | —                        | WR              | F                | 10.4±0.6                   | 20.7±0.6         | Bryansk Oblast       | <i>Populus tremula</i>      | 1          |
| CANTHARELLALES                                |                          |                 |                  |                            |                  |                      |                             |            |
| Hydnaceae                                     |                          |                 |                  |                            |                  |                      |                             |            |
| LE-BIN 3583 <i>Sistotrema raduloides</i>      | —                        | WR              | S                | n/d                        | 25.5±0.6         | Bryansk Oblast       | <i>Populus tremula</i>      | 1          |
| CORTICIALES                                   |                          |                 |                  |                            |                  |                      |                             |            |
| Punctulariaceae                               |                          |                 |                  |                            |                  |                      |                             |            |
| LE-BIN 3603 <i>Punctularia strigosozonata</i> | —                        | WR              | M                |                            |                  | Bryansk Oblast       | <i>Populus tremula</i>      | 1          |
| GLOEOPHYLLALES                                |                          |                 |                  |                            |                  |                      |                             |            |
| Gloeophyllaceae                               |                          |                 |                  |                            |                  |                      |                             |            |
| LE-BIN 4338 <i>Gloeophyllum sepiarium</i>     | —                        | BR <sup>5</sup> | S                | n/d <sup>6</sup>           | 20.4±1.1         | Belgorod Oblast      | <i>Pinus sylvestris</i>     | 2          |
| LE-BIN 4339 <i>G. trabeum</i>                 | —                        | BR              | S                | 25.6±1.3                   | 29.9±0.9         | Belgorod Oblast      | <i>Pyrus communis</i>       | 2          |
| LE-BIN 4332 <i>Neolentinus lepideus</i>       | —                        | BR              | M                | n/d                        | 21.9±1.0         | Belgorod Oblast      | <i>Pinus sylvestris</i>     | 2          |
| HYMENOGHATALES                                |                          |                 |                  |                            |                  |                      |                             |            |
| Hymenochaetaceae                              |                          |                 |                  |                            |                  |                      |                             |            |
| LE-BIN 4785 <i>Fomitiporia hippophaeicola</i> | OQ555678                 | WR              | M                | 12.2±0.7                   | 16.5±0.2         | Republic of Dagestan | <i>Hippophaë rhamnoides</i> | 11         |
| LE-BIN 4345 <i>Inonotus hispidus</i>          | —                        | WR              | M                | n/d                        | 30.8±1.5         | Belgorod Oblast      | <i>Malus domestica</i>      | 2          |
| LE-BIN 4112 <i>Inonotus rheades</i>           | —                        | WR              | M                | n/d                        | 21.6±1.0         | Bryansk Oblast       | <i>Populus tremula</i>      | 1          |
| LE-BIN 4344 <i>Phellinus alni</i>             | —                        | WR              | S                | 17.5±1.2                   | 20.7±0.8         | Kursk Oblast         | <i>Malus domestica</i>      | 2          |
| LE-BIN 4412 <i>Ph. alni</i>                   | —                        | WR              | S                | n/d                        | 15.3±1.1         | Kursk Oblast         | <i>Malus domestica</i>      | 2          |
| LE-BIN 4108 <i>Phellinus laevigatus</i>       | —                        | WR              | F                | 19.8±3.0                   | 18.2±1.1         | Bryansk Oblast       | <i>Betula pendula</i>       | 1          |
| LE-BIN 4340 <i>Phellinus pomaceus</i>         | —                        | WR              | M                | n/d                        | 24.4±0.7         | Belgorod Oblast      | <i>Prunus cerasus</i>       | 2          |
| LE-BIN 4409 <i>Ph. pomaceus</i>               | —                        | WR              | M                | n/d                        | 21.1±0.8         | Belgorod Oblast      | <i>Prunus domestica</i>     | 2          |
| LE-BIN 4410 <i>Ph. pomaceus</i>               | —                        | WR              | F                | 15.0±1.6                   | 19.7±0.5         | Kursk Oblast         | <i>Prunus domestica</i>     | 2          |
| <i>Hymenochaetales genera incertae sedis</i>  |                          |                 |                  |                            |                  |                      |                             |            |

[illegible]

|                                            |          |    |   |          |          |                 |                         |         |
|--------------------------------------------|----------|----|---|----------|----------|-----------------|-------------------------|---------|
| LE-BIN 4002 <i>Aurantiporus fissilis</i>   | —        | WR | F | n/d      | 33.4±1.0 | Bryansk Oblast  | <i>Populus tremula</i>  | 1       |
| LE-BIN 4119 <i>A. fissilis</i>             | —        | WR | M | 26.0±1.2 | 21.8±0.9 | Bryansk Oblast  | <i>Acer platanoides</i> | 1       |
| LE-BIN 4127 <i>Phlebia rufa</i>            | —        | WR | M | 20.9±1.9 | n/d      | Bryansk Oblast  | <i>Populus tremula</i>  | 1       |
| LE-BIN 4128 <i>P. rufa</i>                 | —        | WR | M | 20.2±2.1 | 26.1±0.9 | Bryansk Oblast  | <i>Acer platanoides</i> | 1       |
| LE-BIN 3591 <i>Phlebia tremellosa</i>      | —        | WR | F | 18.4±0.6 | 20.9±0.7 | Bryansk Oblast  | <i>Tilia cordata</i>    | 1       |
| LE-BIN 2138 <i>Sarcodontia crocea</i>      | —        | WR | S | 15.0±0   | 22.5±0,6 | Rostov Oblast   | <i>Malus domestica</i>  | 8       |
| LE-BIN 4342 <i>S. crocea</i>               | MW042103 | WR | S | 29.9±2.2 | n/d      | Belgorod Oblast | <i>Malus domestica</i>  | 7, 8    |
| LE-BIN 4343 <i>S. crocea</i>               | MW042104 | WR | M | 31.2±0.9 | 21.5±0,6 | Belgorod Oblast | <i>Malus domestica</i>  | 7, 8    |
| LE-BIN 4346 <i>S. crocea</i>               | —        | WR | S | 31.8±1.1 | 19.8±0.7 | Belgorod Oblast | <i>Malus domestica</i>  | 7, 8    |
| LE-BIN 4350 <i>S. crocea</i>               | MW042105 | WR | M | 34.8±0.8 | 18.9±0.5 | Belgorod Oblast | <i>Malus domestica</i>  | 7       |
| LE-BIN 4355 <i>S. crocea</i>               | MW042106 | WR | M | 28.9±1.4 | 20.9±1.1 | Oryol Oblast    | <i>Malus domestica</i>  | 7, 8, 9 |
| LE-BIN 4365 <i>S. crocea</i>               | MW042107 | WR | S | 36.3±1.1 | 22.1±1.1 | Oryol Oblast    | <i>Malus domestica</i>  | 7, 8    |
| LE-BIN 4367 <i>S. crocea</i>               | MW042108 | WR | S | 27.9±1.2 | 12.9±1.0 | Oryol Oblast    | <i>Malus domestica</i>  | 7, 8    |
| LE-BIN 4378 <i>S. crocea</i>               | MW042109 | WR | S | 23.0±0.9 | n/d      | Oryol Oblast    | <i>Malus domestica</i>  | 7       |
| LE-BIN 4382 <i>S. crocea</i>               | —        | WR | M | 28.6±1,5 | 21.6±0,6 | Oryol Oblast    | <i>Malus domestica</i>  | 7, 8    |
| LE-BIN 4398 <i>S. crocea</i>               | —        | WR | S | 19.0±1.6 | 12.0±0.9 | Lipetsk Oblast  | <i>Malus domestica</i>  | 2       |
| LE-BIN 4399 <i>S. crocea</i>               | —        | WR | M | 16.7±1.4 | 11.3±1.0 | Lipetsk Oblast  | <i>Malus domestica</i>  | 2       |
| LE-BIN 4400 <i>S. crocea</i>               | —        | WR | S | 26.3±1.4 | 13.3±1.0 | Lipetsk Oblast  | <i>Malus domestica</i>  | 2       |
| LE-BIN 4402 <i>S. crocea</i>               | —        | WR | S | 22.7±1.2 | 14.3±1.0 | Lipetsk Oblast  | <i>Malus domestica</i>  | 2       |
| LE-BIN 4406 <i>S. crocea</i>               | —        | WR | S | 24.5±1.2 | 16.2±1.5 | Lipetsk Oblast  | <i>Malus domestica</i>  | 2       |
| LE-BIN 4408 <i>S. crocea</i>               | —        | WR | S | 29.2±3.3 | 15.3±1.2 | Lipetsk Oblast  | <i>Malus domestica</i>  | 2       |
| LE-BIN 4411 <i>S. crocea</i>               | —        | WR | S | 30.7±0.8 | 13.0±1.1 | Kursk Oblast    | <i>Malus domestica</i>  | 2       |
| <i>Phanerochaetaceae</i>                   |          |    |   |          |          |                 |                         |         |
| LE-BIN 3996 <i>Bjerkandera adusta</i>      | —        | WR | F | n/d      | 25.7±1.0 | Bryansk Oblast  | <i>Populus tremula</i>  | 1       |
| LE-BIN 4107 <i>Bjerkandera fumosa</i>      | —        | WR | F | n/d      | 24.8±0.8 | Bryansk Oblast  | <i>Alnus glutinosa</i>  | 1       |
| LE-BIN 3811 <i>Porostereum spadiceum</i>   | —        | WR | F | n/d      | 20.5±1.0 | Lipetsk Oblast  | <i>Quercus robur</i>    | 2       |
| <i>Podoscyphaceae</i>                      |          |    |   |          |          |                 |                         |         |
| LE-BIN 3616 <i>Abortiporus biennis</i>     | —        | WR | M | 20.0±1.1 | n/d      | Kursk Oblast    | <i>Salix</i> sp.        | 2       |
| <i>Polyporaceae</i>                        |          |    |   |          |          |                 |                         |         |
| LE-BIN 3615 <i>Daedaleopsis confragosa</i> | —        | WR | F | 24.7±1.6 | 20.1±0.3 | Kursk Oblast    | <i>Populus nigra</i>    | 2       |
| LE-BIN 3616 <i>D. confragosa</i>           | —        | WR | M | 22.5±2.1 | 18.8±1.4 | Lipetsk Oblast  | <i>Betula pendula</i>   | 2       |
| LE-BIN 3624 <i>D. confragosa</i>           | —        | WR | F | 17.8±0.3 | 11.0±0.4 | Kursk Oblast    | <i>Prunus padus</i>     | 2       |
| LE-BIN 3625 <i>D. confragosa</i>           | —        | WR | M | 22.8±0.8 | 19.2±0.2 | Kursk Oblast    | <i>Salix</i> sp.        | 2       |
| LE-BIN 3989 <i>D. confragosa</i>           | —        | WR | M | 18.3±0.8 | 24.9±0.8 | Bryansk Oblast  | <i>Populus tremula</i>  | 1       |
| LE-BIN 3828 <i>Funalia trogii</i>          | MZ018630 | WR | F | 28.7±2.9 | 22.9±1.3 | Lipetsk Oblast  | <i>Populus tremula</i>  | 2       |
| LE-BIN 3582 <i>Ganoderma applanatum</i>    | —        | WR | F | 17.4±2.0 | 22.8±0.8 | Bryansk Oblast  | <i>Populus tremula</i>  | 1       |
| LE-BIN 4003 <i>G. applanatum</i>           | —        | WR | F | n/d      | 22.2±0.8 | Bryansk Oblast  | <i>Quercus robur</i>    | 1       |

|                                           |                        |    |   |          |          |                 |                         |   |
|-------------------------------------------|------------------------|----|---|----------|----------|-----------------|-------------------------|---|
| LE-BIN 3620 <i>Ganoderma lucidum</i>      | —                      | WR | S | 23.8±0.9 | 20.9±1.6 | Kursk Oblast    | <i>Quercus robur</i>    | 2 |
| LE-BIN 4333 <i>Lentinus arcularius</i>    | MZ018633               | WR | M | 27.8±0.9 | 17.2±0.9 | Belgorod Oblast | <i>Quercus robur</i>    | 2 |
| LE-BIN 4334 <i>Neofavolus alveolaris</i>  | —                      | WR | M | n/d      | 21.3±0.9 | Belgorod Oblast | <i>Acer negundo</i>     | 2 |
| LE-BIN 4122 <i>Trametes hirsuta</i>       | —                      | WR | F | 26.9±0.9 | 31.6±1.0 | Bryansk Oblast  | <i>Acer platanoides</i> | 1 |
| LE-BIN 4124 <i>T. hirsuta</i>             | —                      | WR | M | 25.7±1.5 | 30.0±0.8 | Bryansk Oblast  | <i>Corylus avellana</i> | 1 |
| LE-BIN 3578 <i>Trametes gibbosa</i>       | —                      | WR | F | 14.9±0.7 | 23.7±0.9 | Bryansk Oblast  | <i>Quercus robur</i>    | 1 |
| LE-BIN 4123 <i>Trametes ochracea</i>      | —                      | WR | F | 24.1±1.0 | 31.1±0.9 | Bryansk Oblast  | <i>Acer platanoides</i> | 1 |
| LE-BIN 3995 <i>Trametes pubescens</i>     | —                      | WR | F | 13.6±1.0 | n/d      | Bryansk Oblast  | <i>Betula pendula</i>   | 1 |
| LE-BIN 4335 <i>Trametes versicolor</i>    | MZ018634               | WR | F | 26.2±0.9 | 28.8±0.8 | Belgorod Oblast | <i>Salix caprea</i>     | 2 |
| <i>Sparassidaceae</i>                     |                        |    |   |          |          |                 |                         |   |
| LE-BIN 4114 <i>Pycnoporellus fulgens</i>  | —                      | WR | M | n/d      | 19.4±0.7 | Bryansk Oblast  | <i>Picea abies</i>      | 1 |
| <i>Steccherinaceae</i>                    |                        |    |   |          |          |                 |                         |   |
| LE-BIN 3832 <i>Etheiroduon fimbriatum</i> | —                      | WR | S | n/d      | 28.0±0.6 | Lipetsk Oblast  | <i>Acer platanoides</i> | 2 |
| LE-BIN 3623 <i>Junghuhnia nitida</i>      | MZ018626               | WR | S | 27.8±0.4 | n/d      | Kursk Oblast    | <i>Prunus padus</i>     | 2 |
| LE-BIN 3819 <i>J. nitida</i>              | MZ018629               | WR | M | 24.6±2.2 | 17.7±0.9 | Lipetsk Oblast  | <i>Salix</i> sp.        | 2 |
| LE-BIN 3576 <i>Metuloidea fragrans</i>    | —                      | WR | S | 25.6±1.4 | 15.9±0.7 | Bryansk Oblast  | <i>Corylus avellana</i> | 1 |
| LE-BIN 3608 <i>M. fragrans</i>            | MZ018625               | WR | S | 27.6±1.4 | 11.5±0.8 | Kursk Oblast    | <i>Alnus glutinosa</i>  | 2 |
| LE-BIN 3609 <i>M. fragrans</i>            | —                      | WR | S | 29.3±1.8 | 15.8±0.5 | Kursk Oblast    | <i>Corylus avellana</i> | 2 |
| LE-BIN 3612 <i>M. fragrans</i>            | —                      | WR | S | 26.2±0.5 | 20.5±0.3 | Kursk Oblast    | <i>Prunus padus</i>     | 2 |
| LE-BIN 3825 <i>M. fragrans</i>            | —                      | WR | S | 29.7±2.9 | 25.0±2.0 | Lipetsk Oblast  | <i>Corylus avellana</i> | 2 |
| LE-BIN 3830 <i>M. fragrans</i>            | —                      | WR | S | 31.3±3.0 | 26.2±2.2 | Lipetsk Oblast  | <i>Betula pendula</i>   | 2 |
| LE-BIN 3834 <i>M. fragrans</i>            | —                      | WR | S | 27.0±1.1 | 22.8±1.8 | Lipetsk Oblast  | <i>Prunus padus</i>     | 2 |
| LE-BIN 3972 <i>M. fragrans</i>            | —                      | WR | M | 25.3±2.6 | 24.6±1.9 | Bryansk Oblast  | <i>Corylus avellana</i> | 1 |
| LE-BIN 3976 <i>M. fragrans</i>            | —                      | WR | M | 23.1±0.9 | 23.0±0.5 | Bryansk Oblast  | <i>Betula pendula</i>   | 1 |
| LE-BIN 3980 <i>M. fragrans</i>            | —                      | WR | M | 27.0±1.1 | 25.5±0.8 | Bryansk Oblast  | <i>Populus tremula</i>  | 1 |
| LE-BIN 3982 <i>M. fragrans</i>            | —                      | WR | M | 19.7±1.6 | 27.6±1.2 | Bryansk Oblast  | <i>Corylus avellana</i> | 1 |
| LE-BIN 3983 <i>M. fragrans</i>            | —                      | WR | M | 15.7±0.9 | 24.6±1.0 | Bryansk Oblast  | <i>Corylus avellana</i> | 1 |
| LE-BIN 3991 <i>M. fragrans</i>            | —                      | WR | S | 26.4±1.3 | 22.9±1.0 | Bryansk Oblast  | <i>Corylus avellana</i> | 1 |
| LE-BIN 4000 <i>M. fragrans</i>            | —                      | WR | S | 25.3±1.1 | 22.8±1.2 | Bryansk Oblast  | <i>Betula pendula</i>   | 1 |
| LE-BIN 4001 <i>M. fragrans</i>            | —                      | WR | M | 30.3±1.8 | 25.4±1.3 | Bryansk Oblast  | <i>Corylus avellana</i> | 1 |
| LE-BIN 3826 <i>Steccherinum bourdotii</i> | MG711809               | WR | M | 33.8±3.3 | 17.2±0.4 | Lipetsk Oblast  | <i>Quercus robur</i>    | 2 |
| LE-BIN 3577 <i>Steccherinum ochraceum</i> | —                      | WR | S | 26.6±1.2 | 13.5±0.5 | Bryansk Oblast  | <i>Corylus avellana</i> | 1 |
| LE-BIN 3611 <i>S. ochraceum</i>           | KY321182 /<br>MG711808 | WR | M | 31.8±0.3 | 14.4±0.8 | Kursk Oblast    | <i>Corylus avellana</i> | 2 |
| LE-BIN 3617 <i>S. ochraceum</i>           | KY321180 /<br>MG609023 | WR | M | 29.4±0.5 | 20.2±1.4 | Kursk Oblast    | <i>Corylus avellana</i> | 2 |

|                                          |                     |    |   |          |          |                 |                         |   |
|------------------------------------------|---------------------|----|---|----------|----------|-----------------|-------------------------|---|
| LE-BIN 3622 <i>S. ochraceum</i>          | KY321181 / MG609022 | WR | M | 25.0±0.3 | n/d      | Kursk Oblast    | <i>Populus tremula</i>  | 2 |
| LE-BIN 3824 <i>S. ochraceum</i>          | MG609021            | WR | S | 30.0±1.4 | 14.9±1.1 | Lipetsk Oblast  | <i>Betula pendula</i>   | 2 |
| LE-BIN 3827 <i>S. ochraceum</i>          | MG609031            | WR | S | 36.3±3.2 | 19.3±1.7 | Lipetsk Oblast  | <i>Corylus avellana</i> | 2 |
| LE-BIN 3836 <i>S. ochraceum</i>          | MG609020            | WR | M | 42.6±3.9 | 26.1±1.6 | Lipetsk Oblast  | <i>Acer platanoides</i> | 2 |
| LE-BIN 3977 <i>S. ochraceum</i>          | —                   | WR | M | 32.2±0.8 | 30.3±1.2 | Bryansk Oblast  | <i>Corylus avellana</i> | 1 |
| LE-BIN 3981 <i>S. ochraceum</i>          | —                   | WR | S | 32.5±0.7 | 20.3±0.8 | Bryansk Oblast  | <i>Corylus avellana</i> | 1 |
| LE-BIN 3984 <i>S. ochraceum</i>          | —                   | WR | F | 30.4±0.9 | 29.4±1.4 | Bryansk Oblast  | <i>Corylus avellana</i> | 1 |
| LE-BIN 3985 <i>S. ochraceum</i>          | —                   | WR | S | 16.7±0.9 | 20.9±1.2 | Bryansk Oblast  | <i>Quercus robur</i>    | 1 |
| LE-BIN 4005 <i>S. ochraceum</i>          | —                   | WR | S | 33.1±1.2 | 28.2±1.7 | Bryansk Oblast  | <i>Corylus avellana</i> | 1 |
| RUSSULALES                               |                     |    |   |          |          |                 |                         |   |
| Hericiaceae                              |                     |    |   |          |          |                 |                         |   |
| LE-BIN 3594 <i>Heridium coralloides</i>  | —                   | WR | S | 18.5±1.2 | 12.1±0.6 | Bryansk Oblast  | <i>Populus tremula</i>  | 1 |
| Peniophoraceae                           |                     |    |   |          |          |                 |                         |   |
| LE-BIN 3815 <i>Peniophora cinerea</i>    | MZ018628            | WR | M | 16.2±0.8 | 22.1±1.9 | Lipetsk Oblast  | <i>Sorbus aucuparia</i> | 2 |
| LE-BIN 4336 <i>P. cinerea</i>            | MZ018635            | WR | M | 27.2±0.9 | 22.8±0.6 | Belgorod Oblast | <i>Pyrus communis</i>   | 2 |
| LE-BIN 4337 <i>P. incarnata</i>          | —                   | WR | M | 22.9±2.1 | 29.5±1.0 | Belgorod Oblast | <i>Prunus armeniaca</i> | 2 |
| LE-BIN 3814 <i>Peniophora quercina</i>   | MZ018627            | WR | M | 21.6±2.1 | 28.9±2.4 | Lipetsk Oblast  | <i>Quercus robur</i>    | 2 |
| LE-BIN 3833 <i>P. quercina</i>           | MZ018631            | WR | M | 20.9±1.6 | 26.2±0.8 | Lipetsk Oblast  | <i>Quercus robur</i>    | 2 |
| Stereaceae                               |                     |    |   |          |          |                 |                         |   |
| LE-BIN 3618 <i>Stereum</i> sp.           | —                   | WR | M | 13.8±0.8 | 17.3±0.6 | Kursk Oblast    | undefined wood          | 2 |
| LE-BIN 3593 <i>Xylobolus frustulatus</i> | —                   | WR | S | n/d      | 22.2±0.6 | Bryansk Oblast  | <i>Quercus robur</i>    | 1 |
| LE-BIN 4125 <i>X. frustulatus</i>        | —                   | WR | M | n/d      | 21.6±0.6 | Bryansk Oblast  | <i>Quercus robur</i>    | 1 |

<sup>1</sup>LGR – linear growth rate (S – slow, M – medium, F – fast); <sup>2</sup>ABTS – 2,2'-azino-bis 3-ethylbenzothiazoline-6-sulfonic acid; <sup>3</sup>CMC – carboxymethyl cellulose; <sup>4</sup>WR – white rot; <sup>5</sup>BR – brown rot; <sup>6</sup>n/d – not detected.

## References

- Shakhova, N.; Volobuev, S. Revealing new active and biotechnologically perspective producers of oxidative and cellulolytic enzymes among pure cultures of xylotrophic Agaricomycetes from the Southern Non-Chernozem zone of the European part of Russia. Curr. Res. Environ. Appl. Mycol. J. Fungal Biol. 2020a, 10(1), 113–119. <https://doi.org/10.5943/cream/10/1/12>
- Volobuev, S.; Shakhova, N. Towards the Discovery of Active Lignocellulolytic Enzyme Producers: A Screening Study of Xylotrophic Macrofungi from the Central Russian Upland. Iranian Journal of Science and Technology, Transactions A: Science. 2022, 46(1), 91–100. <https://doi.org/10.1007/s40995-021-01245-7>

3. Glazunova, O. A.; Shakhova, N. V.; Psurtseva, N. V.; Moiseenko, K. V.; Kleimenov, S. Y.; Fedorova T. V. White-rot basidiomycetes *Junghuhnia nitida* and *Steccherinum bourdotii*: Oxidative potential and laccase properties in comparison with *Trametes hirsuta* and *Coriolopsis caperata*. *PLoS One*. 2018, 13(6), e0197667. <https://doi.org/10.1371/journal.pone.0197667>
4. Moiseenko, K.; Glazunova, O.; Shakhova, N.; Savinova, O.; Vasina, D.; Tyazhelova, T.; Psurtseva, N.; Fedorova, T. Data on the genome analysis of the wood-rotting fungus *Steccherinum ochraceum* LE-BIN 3174. *Data in brief*. 2020, 29, 105169. <https://doi.org/10.1016/j.dib.2020.105169>
5. Moiseenko, K. V. Glazunova, O. A.; Shakhova, N. V.; Savinova, O. S.; Vasina, D. V.; Tyazhelova, T. V.; Psurtseva, N.V.; Fedorova, T. V. Fungal adaptation to the advanced stages of wood decomposition: Insights from the *Steccherinum ochraceum*. *Microorganisms*. 2019, 7(11), 527–543. <https://doi.org/10.3390/microorganisms7110527>
6. Glazunova, O. A.; Moiseenko, K. V.; Shakhova, N. V.; Psurtseva, N. V.; Fedorova, T. V. Biodegradation potential of *Steccherinum ochraceum*: growth on different wood types and preliminary evaluation of enzymatic activities. *KnE Life Sciences*. 2022, 7(10), 207–215. <https://doi.org/10.18502/cls.v7i1.10123>
7. Shakhova, N. V.; Volobuev, S. V. Culture characteristics and enzymatic activity of *Sarcodontia crocea* (Basidiomycota) strains collected from the Central Russian Upland. *Mycology and Phytopathology*. 2020b, 54 (6), 446–451. <https://doi.org/10.31857/S0026364820060100>
8. Volobuev, S. V.; Shakhova N. V. A comparative study on growth and lignocellulolytic activity of nine *Sarcodontia crocea* strains in four different media. *Diversity of plant world*. 2020, 3(6), 45–54. <https://doi.org/10.22281/2686-9713-2020-3-45-54>
9. Whaley, A. K.; Ponkratova, A. O.; Orlova, A. A.; Volobuev, S. V.; Shakhova, N. V.; Serebryakov, E. B.; Smirnov, S. N.; Pustovit, N. V.; Kraeva, L. A.; Luzhanin V. G.; New benzoquinone pigments from the hydroid fungus *Sarcodontia setosa* and their biosynthetic relationship. *Natural Product Research*. 2023a, 1–10. <https://doi.org/10.1080/14786419.2023.2195176>
10. Whaley, A. O.; Whaley, A. K.; Orlova, A. A.; Volobuev, S. V.; Shakhova, N. V.; Smirnov, S. N.; Pustovit, N. V.; Kraeva, Polyacetylene derivatives from the Polypore fungus (*Fistulina hepatica*, Agaricomycetes) and their antimicrobial activity. *International Journal of Medicinal Mushrooms*. 2023b, 25(12), 43–53.
11. Shakhova, N.; Volobuev, S. Cultural and enzymatic activity studies of a pathogenic wood-decaying fungus *Fomitiporia hippophaeicola* (Hymenochaetales, Basidiomycota), recollected in the Eastern Caucasus. *Arch Microbiol* 205. 2023, Article number: 249. <https://doi.org/10.1007/s00203-023-03587-9>
